# Supplementary material for: The Loop-Mediated Isothermal Amplification for the Rapid Detection of Porphyromonas Gingivalis
Source: MDPI journal article supplement (doi:10.3390/app13042500), 2023-02-15

# Supplementary Materials - The Loop-Mediated Isothermal Amplification for the Rapid Detection of Porphyromonas Gingivalis – Lenkowski et al.

Table S1. The sequences of LAMP primers.

| Accession Number/Periopathogen | Primer      |                                                  | Length |
|--------------------------------|-------------|--------------------------------------------------|--------|
| *000205<br>T. forsythia        | F3          | GAACACCGTGAGGAATCTC                              | 19     |
|                                | B3          | AACACGGCATAACATAATTCAATT                         | 24     |
|                                | FIP(F1c+F2) | GAATTCTTCCTCTTCCTTGCAGATGGTTAATTGTTATGCGTGGTAC   | 47     |
|                                | BIP(B1c+B2) | AATTGTCAATGGTCAATGGTTATGCGATTGTCAATTGTCATACCAGGT | 48     |
|                                | LoopF       | CCTCACGATGTTCCGGAATGA                            | 20     |
|                                | LoopB       | TGGTTACACGCCGAATCAT                              | 19     |
|                                | F2          | GGTTAATTGTTATGCGTGGTAC                           | 22     |
|                                | F1c         | GAATTCTTCCTCTTCCTTGCAGAT                         | 25     |
|                                | B2          | ATTGTCAATTGTCATACCAGGT                           | 22     |
|                                | B1c         | AATTGTCAATGGTCAATGGTTATGCG                       | 26     |
|                                | Product     |                                                  | 194    |
|                                |             |                                                  |        |
| *000167<br>P. gingivalis       | F3          | CAACGAGCATTCCAGGAA                               | 18     |
|                                | B3          | AAGTCCACGAGACCTACTT                              | 19     |
|                                | FIP(F1c+F2) | TCTTTGATCAATTCCATCGGGATACCTGCTATCGCTGAGTACGA     | 44     |
|                                | BIP(B1c+B2) | CGGTGTGAATCTCTCTAATTGCGAATCGTACATTGCGAACCAA      | 43     |
|                                | LoopF       | GAACGGGTAGCGTACCAAA                              | 19     |
|                                | LoopB       | AACTGACTCTTACTGGACACG                            | 21     |
|                                | F2          | TGCTATCGCTGAGTACGA                               | 18     |
|                                | F1c         | TCTTTGATCAATTCCATCGGGATACC                       | 26     |
|                                | B2          | ATCGTACATTGCGAACCAA                              | 19     |
|                                | B1c         | CGGTGTGAATCTCTCTAATTGCGA                         | 24     |
|                                | Product     |                                                  | 250    |
|                                |             |                                                  |        |
| *000204<br>F. nucleatum        | F3          | TGGTTCCAGAAGAAGAAATTAACA                         | 23     |
|                                | B3          | AAACACCATCTACTTCAATTTCAA                         | 24     |
|                                | FIP(F1c+F2) | GGTCAGAACCAACTCCTACAAAATGGAAGCTACAAGAGAAGAA      | 43     |
|                                | BIP(B1c+B2) | AAGATCAAGAAGGACAAGTTGCTGACTGGTGTCATTCTTCCAA      | 43     |
|                                | LoopF       | TAACCTCATACCATACACGAGGATC                        | 25     |
|                                | LoopB       | AATTGATCATGAACATGGTAGAGTT                        | 25     |
|                                | F2          | AATGGAAGCTACAAGAGAAGAA                           | 22     |
|                                | F1c         | GGTCAGAACCAACTCCTACAA                            | 21     |
|                                | B2          | CTGGTGTCATTCTTCCAA                               | 18     |
|                                | B1c         | AAGATCAAGAAGGACAAGTTGCTGA                        | 25     |
|                                | Product     |                                                  | 332    |
|                                |             |                                                  |        |

Table S2. The sequences of PCR primers.

| Periopathogen                  | Primer   |            |                          | Length |
|--------------------------------|----------|------------|--------------------------|--------|
| Tanarella forsythia (BspA)     | F3       | Tan Fors-F | GAACACCGTGAGGAATCTC      |        |
|                                | B3       | Tan Fors-R | AATTGAATTATGTTATGCCGTGTT |        |
|                                | Amplicon |            |                          | 106bp  |
| Fusobacterium nucleatum (NusG) | F3       | FusNuc-F   | AAACACCATCTACTTCAATTTCAA |        |
|                                | B3       | FusNuc-R   | TTGAAATTGAAGTAGATGGTGTTT |        |
|                                | Amplicon |            |                          | 197bp  |

**Supplementary Materials - The Loop-Mediated Isothermal Amplification for the Rapid Detection of Porphyromonas Gingivalis – Lenkowski et al.**

|                                                     |          |          |                    |      |
|-----------------------------------------------------|----------|----------|--------------------|------|
| Porphyromonas gingivalis (Complete Genome Sequence) | F3       | Porgin-F | CAACGAGCATTCCAGGAA |      |
|                                                     | B3       | Porgin-R | AGGTAGGTCTGTGGACTT |      |
|                                                     | Amplicon |          |                    | 70bp |

Table S3. The detailed reagents for LAMP.

| Reagent               | Volume  | Concentration  |
|-----------------------|---------|----------------|
| Template              | 0.8 µl  |                |
| Isothermal Master Mix | 6.0 µl  |                |
| FIP & BIP             | 0.8 µl  | 20 pmol (each) |
| F3 & B3               | 0.8 µl  | 5 pmol (each)  |
| LoopF & LoopB         | 0.8 µl  | 10 pmol (each) |
| Water                 | 0.8 µl  |                |
|                       | 10.0 µl |                |

Table S4. The detailed reagents for PCR.

| Reagent                | Volume  | Concentration |
|------------------------|---------|---------------|
| Template               | 1.0 µl  |               |
| Buffer 700 mM Tris-HCl | 0.2 µl  |               |
| Allegro TAQ polymerase | 0.2 µl  | 1 U           |
| PCR starters           | 2.0 µl  | 0.1-1 µM      |
| dNTP                   | 0.8 µl  | 0.2 mM        |
| Water                  | 14.0 µl |               |
|                        | 20.0 µl |               |

Table S5. The detailed reagents for qPCR.

| Reagent                                 | Volume  | Concentration |
|-----------------------------------------|---------|---------------|
| Template                                | 0.5 µl  |               |
| 2x QuantiFast SYBR Green PCR Master Mix | 5.0 µl  |               |
| F3 & B3                                 | 1.0 µl  | 5 pmol (each) |
| Water                                   | 3.5 µl  |               |
|                                         | 10.0 µl |               |

# Supplementary Materials - The Loop-Mediated Isothermal Amplification for the Rapid Detection of Porphyromonas Gingivalis – Lenkowski et al.

Figure S1. Fluorescent curves of LAMP.

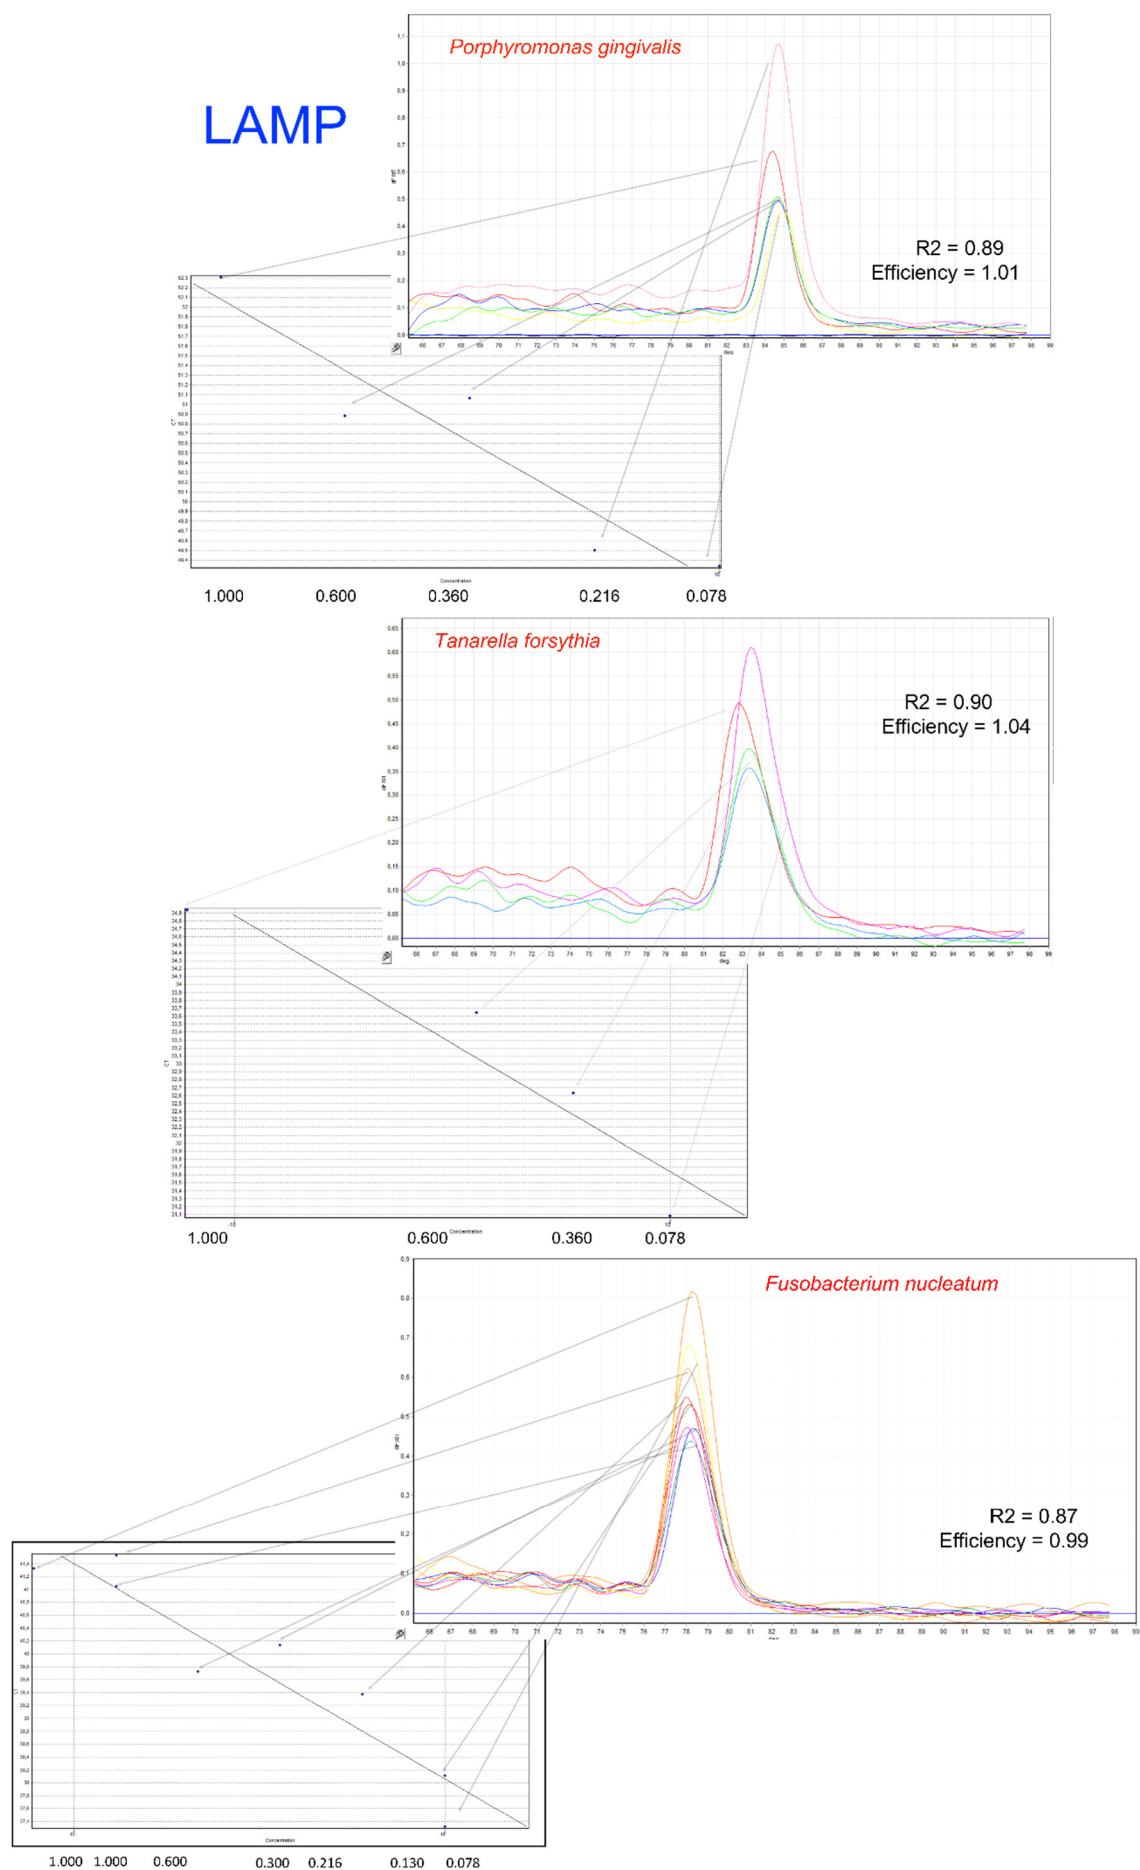

# Supplementary Materials - The Loop-Mediated Isothermal Amplification for the Rapid Detection of Porphyromonas Gingivalis – Lenkowski et al.

Figure S2. Fluorescent curves of qPCR.

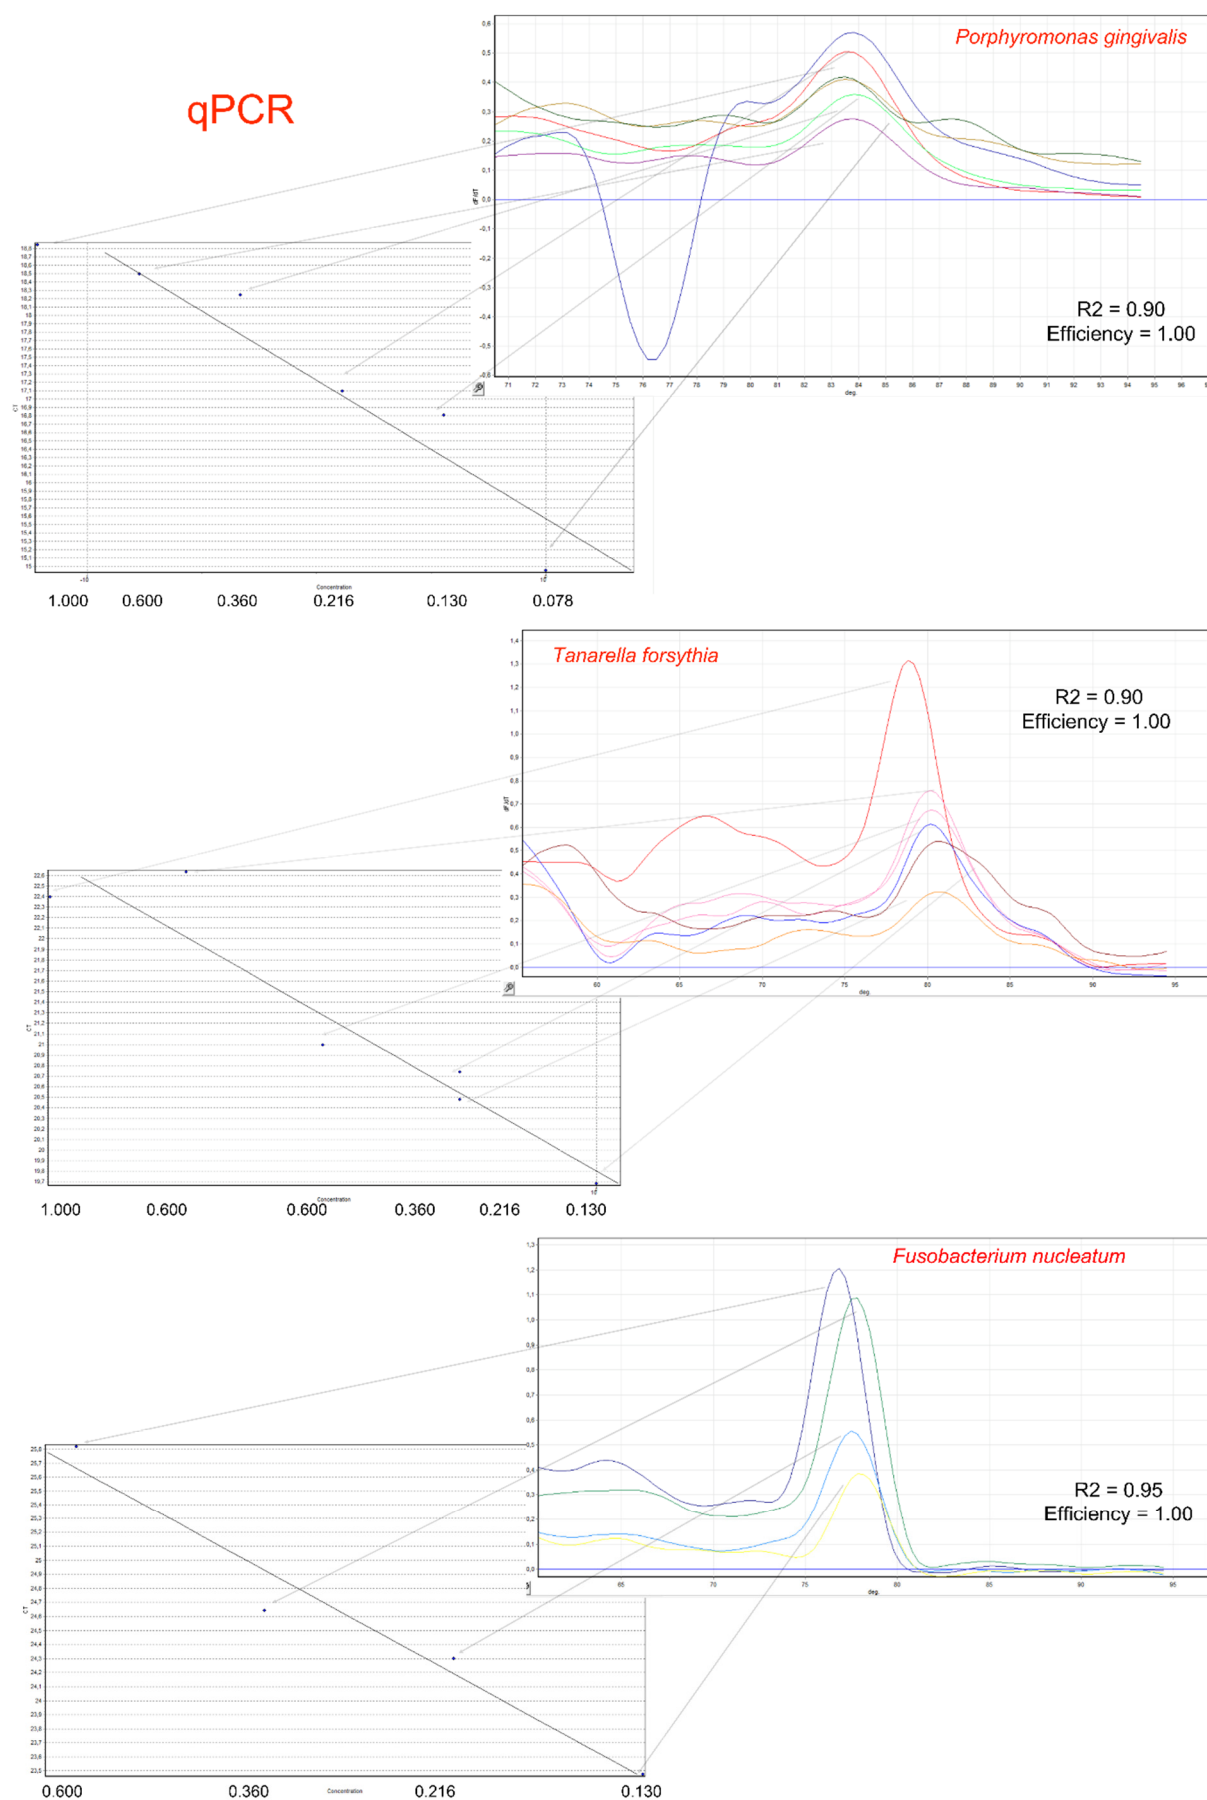

Supplement: s1 [file s1]
